# Supplementary material for: Stuck between medals and participation: an institutional theory perspective on why sport federations struggle to reach Sport-for-All goals
Source: Research Square preprint supplement (doi:10.21203/rs.3.rs-1376210/v1), 2022-03-09
Supplement: Supplementary file 1 [file 4d1888ad9b26eaa141a16e67.pdf]

**Table 2: Target groups aimed at by the Sport-for-All projects**

| Target group                                    | Sport federations with a high performance logic |                                       | Sport federations with a Sport-for-All logic |                                       |
|-------------------------------------------------|-------------------------------------------------|---------------------------------------|----------------------------------------------|---------------------------------------|
|                                                 | % of representation in the projects             | Mean of projects per sport federation | % of representation in the projects          | Mean of projects per sport federation |
| <b>Open for all</b>                             | 28.7                                            | 2                                     | 22.9                                         | 1.8                                   |
| <b>Youth</b>                                    | 30.9                                            | 2.1                                   | 16.7                                         | 1.3                                   |
| <b>Seniors</b>                                  | 6.2                                             | .4                                    | 20.8                                         | 1.7                                   |
| <b>Disabled</b>                                 | 11.8                                            | .8                                    | 9.4                                          | .8                                    |
| <b>Adults</b>                                   | 6.2                                             | .4                                    | 3.1                                          | .3                                    |
| <b>Coaches</b>                                  | 3.4                                             | .2                                    | 3.1                                          | .3                                    |
| <b>Females</b>                                  | 2.8                                             | .2                                    | 2.1                                          | .3                                    |
| <b>Families</b>                                 | 2                                               | .1                                    | 5.2                                          | .4                                    |
| <b>participants with a migration background</b> | 3.4                                             | .2                                    | 7.3                                          | .6                                    |
| <b>Companies</b>                                | 1.7                                             | .1                                    | 1.0                                          | .1                                    |
| <b>Students</b>                                 | .6                                              | .0                                    | .0                                           | .0                                    |
| <b>Lower SES-groups</b>                         | 2.8                                             | .2                                    | 8.3                                          | .7                                    |
